# Supplementary material for: Inhibition of light emission from the metastable tetragonal phase at low temperatures in island-like films of lead iodide perovskites
Source: Royal Society of Chemistry journal article supplement (doi:10.1039/c9nr07543g), 2019-01-01

Supplementary information for

***Inhibition of light emission from metastable tetragonal phase at low temperatures in strain-relaxed island-like films of lead iodide perovskites***

*Raquel Chulia-Jordan, Natalia Fernández-Delgado, Emilio J. Juárez-Pérez<sup>3</sup>, Iván Mora-Sero<sup>3</sup>, Miriam Herrera, Sergio I. Molina, Juan P. Martínez-Pastor*

Figure S1 – Deconvolution of PL spectra as a function of Energy

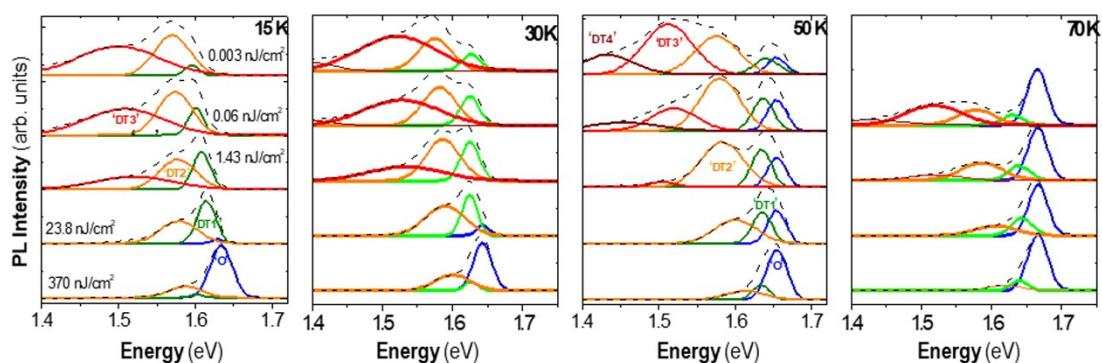

Figure S2 – Intensity (T)

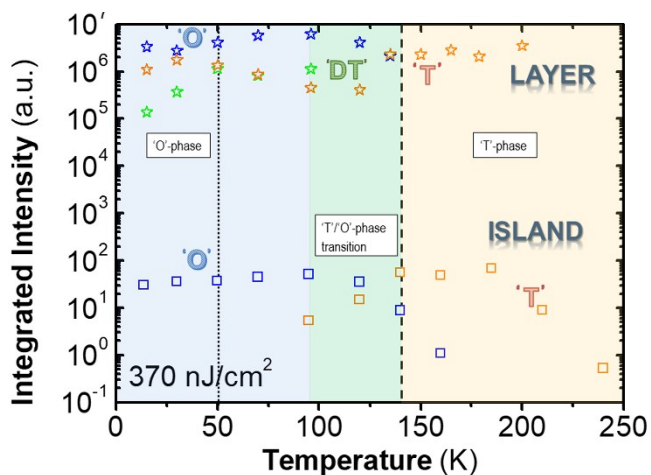

Figure S3 – Energy (T)

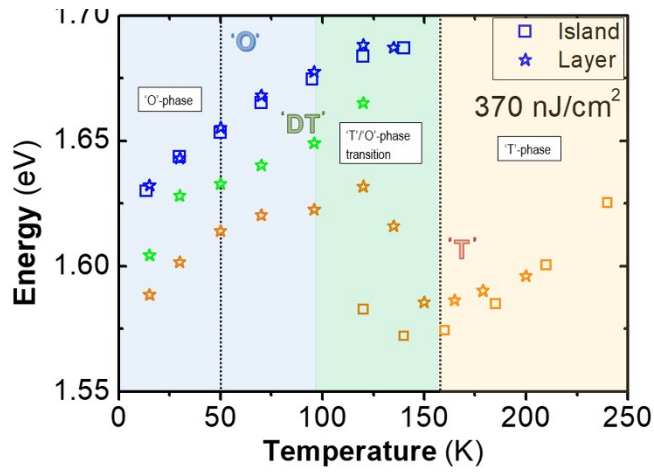

Figure S4 ---- PL intensity vs power with linear fitting (to extract slopes)

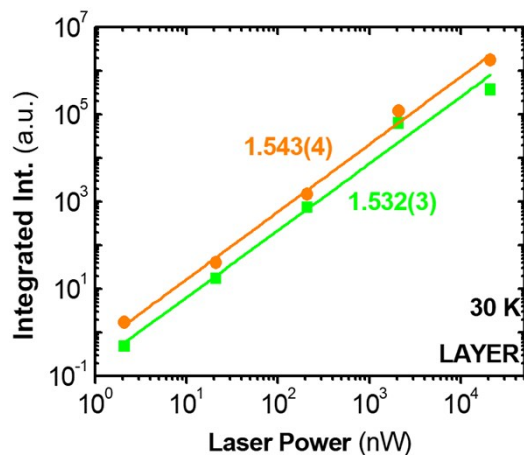

Figure S5 --- FWHM (T)

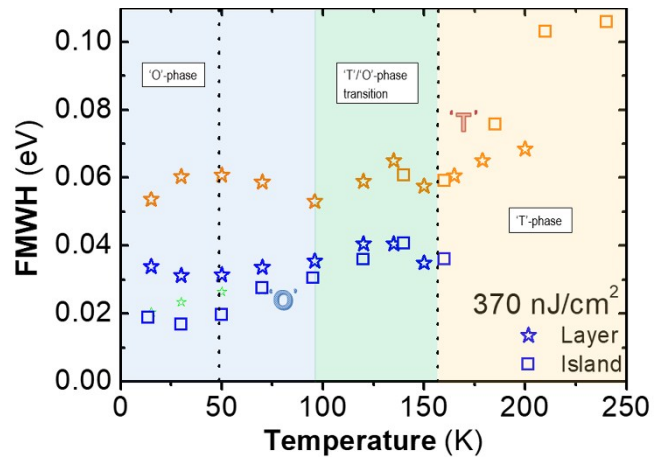

Supplement: c9nr07543g1.pdf [file c9nr07543g1.pdf]
